# Supplementary material for: 思春期の子どもにとって身体表現としての指揮的表現のもつ教育的意義 : 音楽活動における思考過程への着目(2.表現活動における身体表現,I 表現活動の展開)
Source: Royal Society of Chemistry journal article supplement (doi:10.1039/c5an02094h), 2009-03-31
Supplement: c5an02094h1.pdf [file c5an02094h1.pdf]

## Electronic Supplementary Information

### Self-Assembled Biosensor with Universal Reporter and Dual-Quenchers for Detection of Unlabelled Nucleic Acids

Liming Huang<sup>\*a</sup>, Gyan H. Aryal,<sup>a</sup> Suk-Wah Tam-Chang<sup>\*a</sup>, Nelson G. Publicover<sup>a</sup>, and Kenneth W. Hunter<sup>a</sup>

<sup>a</sup> Department of Microbiology and Immunology, School of Medicine, University of Nevada, Reno, NV 89557, USA. E-mail: huang@medicine.nevada.edu

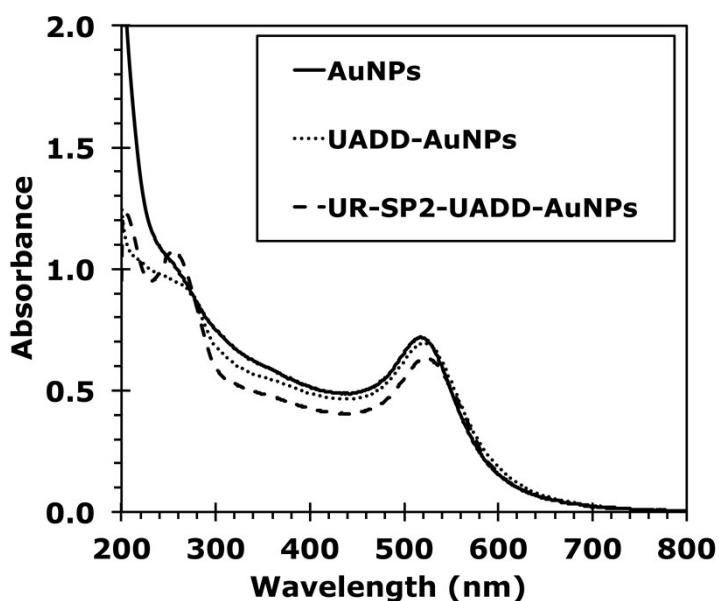

**Figure S1.** UV-vis absorption spectra of fresh AuNPs (10 nm diameter, 0.01 wt%,  $5.7 \times 10^{12}$  particles/mL  $\approx 9.5 \times 10^{-9}$  M), UADD-AuNPs, and UR-SP2-UADD-AuNPs.

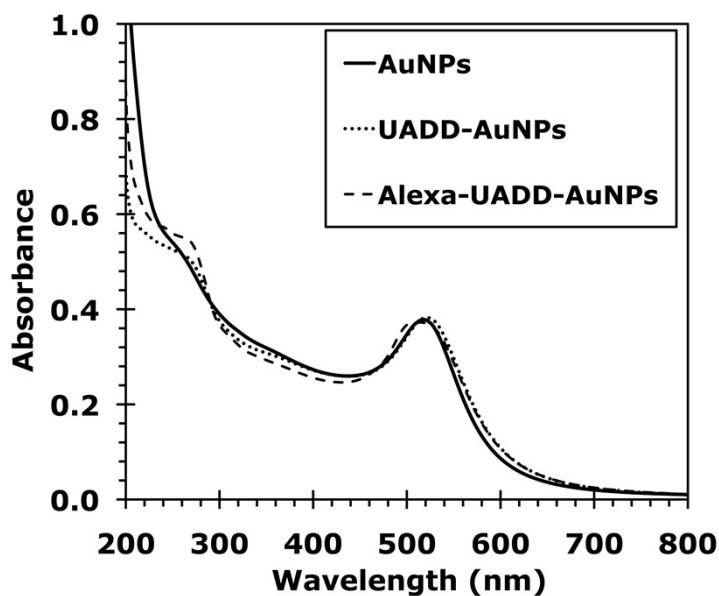

**Figure S2.** UV-vis absorption spectra of fresh AuNPs (10 nm diameter, 0.01 wt%,  $5.7 \times 10^{12}$  particles/mL  $\approx 9.5 \times 10^{-9}$  M), UADD-AuNPs and Alexa-UADD-AuNPs.

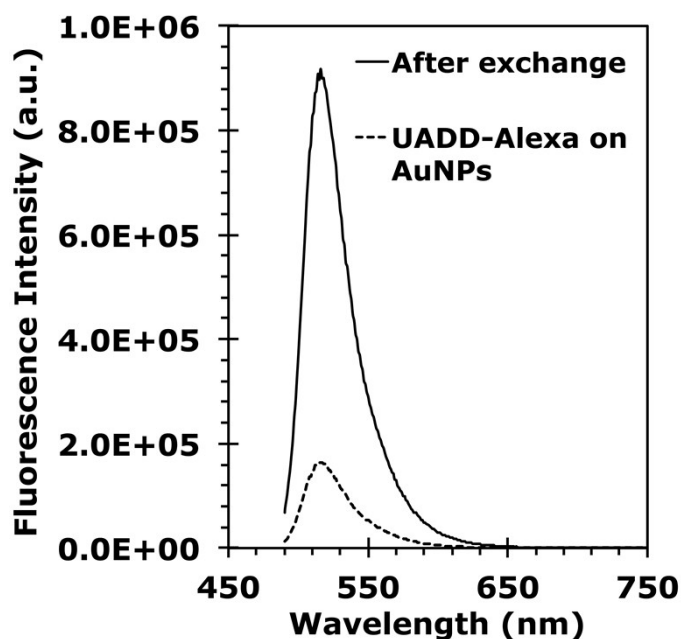

**Figure S3.** Fluorescence spectra of Alexa-UADD on AuNPs ( $\sim 0.16$  nM AuNPs) before and after replacement with excess mercaptoacetic acid (0.001 M). The fluorescence spectra were collected when samples were excited at 488 nm.

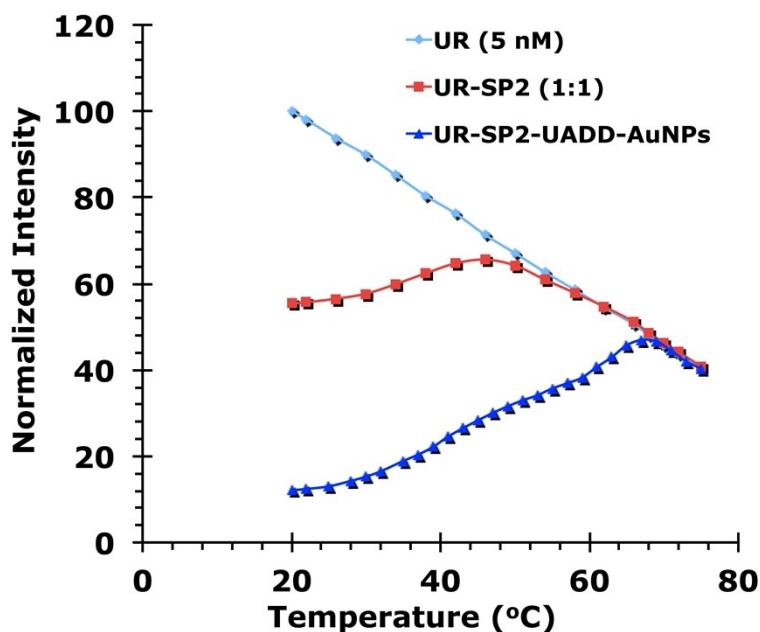

**Figure S4.** The temperature-fluorescence intensity (normalized) profiles of UR (5 nM), UR-SP2 (1:1 ratio of UR and SP2), and UR-SP2-UADD-AuNPs (5 nM of UR on AuNPs) in buffer. Fluorescence emission of samples were collected when samples were excited at 550 nm during the cooling process from 76 °C to 20 °C with a cooling rate 1 °C / 2 minutes.

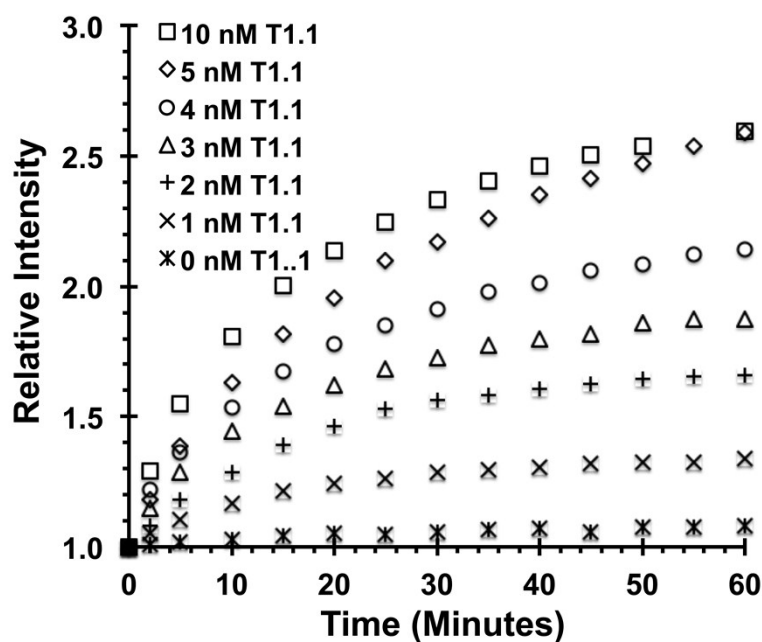

**Figure S5.** The time course of relative fluorescence intensity of UR-SP1-UADD-AuNPs (UR concentration: 5nM) incubating with 0, 1, 2, 3, 4, 5, and 10 nM of T1.1 at 37 °C. Fluorescence emission of samples were collected when samples were excited at 550 nm.

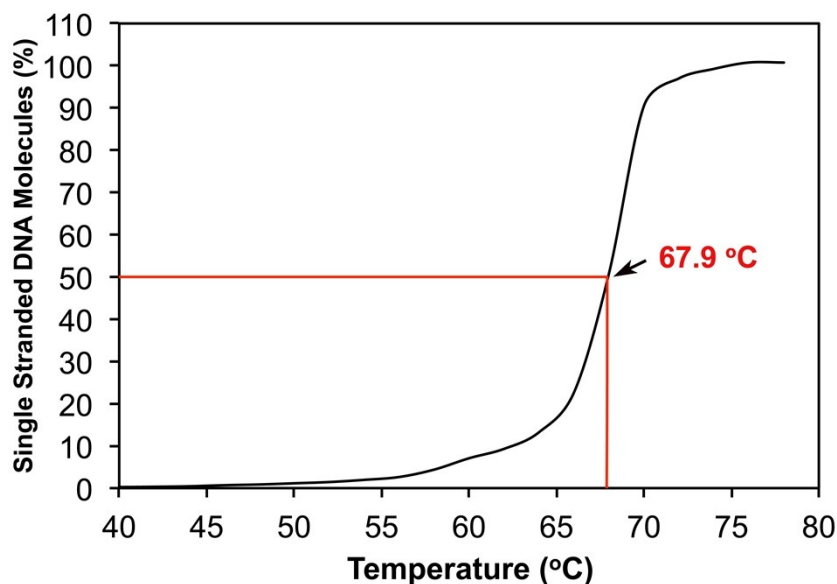

**Figure S6.** Melting curve of UR (TAMRA-linker-AAA ATA ACC ACC CAC CCA CCC). The UV absorption spectra (from 300 to 200 nm) of UR (100 nM in PBS buffer pH 7.4, 137 mM NaCl and 5 mM Mg<sup>2+</sup>) were recorded every 2 °C during the heating process from 40 to 78 °C. A temperature controlled circulating water bath (model 9105, Fisher Scientific) was used for the experiment.

**Table S1.** Prices and guaranteed yields for custom synthesis of a dual-labelled MB, UR and UADD shown on [www.idtdna.com](http://www.idtdna.com)

| DNA Oligo                                           | Dual-Labelled MB<br>5' TAMRA-linker- <b>CCC TTA</b><br><b>CAT CGT GGG TGC TTC CGT</b><br><b>AAG GGT</b> -BHQ1 3' | UR<br>5' TAMRA-linker- <b>AAA ATA</b><br><b>ACC ACC CAC CCA CCC</b> - 3' | UADD<br>5' C6SS- <b>CTC TCC CTC CCT</b><br><b>CCC TCC C</b> - 3' |
|-----------------------------------------------------|------------------------------------------------------------------------------------------------------------------|--------------------------------------------------------------------------|------------------------------------------------------------------|
| Prices for 100 nmole with 100 nmole synthetic scale | \$360<br>(3.2 nmol guaranteed yield)                                                                             | \$167<br>(4.4 nmol guaranteed yield)                                     | \$181.40<br>(7.1 nmol guaranteed yield)                          |
| Prices with 10 $\mu$ mole synthetic scale           |                                                                                                                  | \$22.7<br>(4.4 nmol guaranteed yield)                                    | \$15.35<br>(7.1 nmol guaranteed yield)                           |
